# Supplementary material
Source: ML conference proceedings conference paper supplement (https://openaccess.thecvf.com/content/CVPR2025/html/Lee_OmniSplat_Taming_Feed-Forward_CVPR_2025_paper.html)
Supplement: Supplementary file 1 [file Lee_OmniSplat_Taming_Feed-Forward_CVPR_2025_supplemental.zip]

# OmniSplat: Taming Feed-Forward 3D Gaussian Splatting for Omnidirectional Images with Editable Capabilities

## Supplementary Material

### A. Details on OmniSplat+opt

As briefly mentioned in Section 4.1, we add a small number of optimizations for each scene using the reference view images for fast performance improvement and call the method ‘OmniSplat+opt.’ Compared to ODGS [20], the optimization process of OmniSplat+opt is different in many aspects. First, while ODGS starts optimization from the sparse point cloud estimated by OpenMVG [26], our model starts from 3D Gaussians generated by OmniSplat, which contains much more information. Next, we set the number of optimization steps of OmniSplat+opt to 100, whereas ODGS optimizes 30,000 times. Since OmniSplat’s initial points are highly accurate, significant performance improvement can be achieved with a small number of iterations. Thus, the optimization time only takes 11 seconds, which is more than 150 times shorter than ODGS (32 minutes). Finally, we only optimize the color (sh coefficients) and opacity properties of 3DGS and keep the position and covariance fixed since changes in position or covariance can cause overfitting when optimizing with a few images.

**Ablation Studies: number of optimizing iterations** We measure the performance of test view images according to the number of optimizing iterations, starting from the original OmniSplat. As mentioned, optimization with reference images improves performance in test view images in the earlier stage. However, if we optimize 3DGS for a long time only with the reference views, the 3DGS may be overfitted, and the performance of the test views may be saturated or even reduced. Table A shows the changes of metrics (PSNR, SSIM, and LPIPS) as well as optimization time according to the number of optimization iterations (# opt.) in OmniBlender [7]. PSNR grows rapidly at the first 100 iterations but becomes saturated as optimization proceeds. For SSIM and LPIPS, the best value is achieved after 200 and 400 iterations of optimization and gets worse when the number of iterations gets larger. In terms of time, the optimization takes about 12 seconds for 100 iterations, and the time linearly grows as the number of optimizations increases. We find out that 100 or 200 iterations are optimal for additional optimization from OmniSplat, considering both time and performance. In the main manuscript, we use 100 times optimization, which takes a similar time to PixelSplat or LatentSplat.

We illustrate the PSNR-runtime trade-off, including the values of Table A in Figure A. Compared to existing feed-forward models, OmniSplat achieves higher PSNR with the

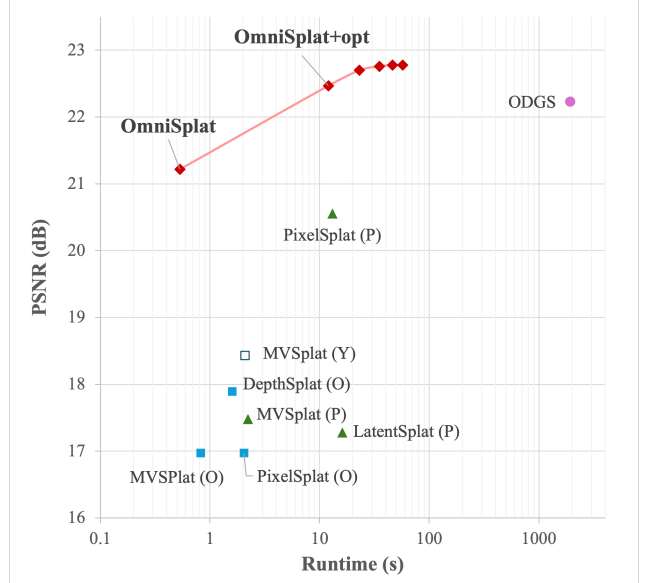

Figure A. **PSNR-runtime trade-off.** A chart of reconstruction performance-runtime trade-off in novel view image on OmniBlender [7] including the ablation according to the number of optimizations.

| # opt.   | 0      | 100    | 200           | 300    | 400           | 500          |
|----------|--------|--------|---------------|--------|---------------|--------------|
| PSNR     | 21.22  | 22.47  | 22.70         | 22.76  | 22.78         | <b>22.78</b> |
| SSIM     | 0.6519 | 0.6960 | <b>0.6979</b> | 0.6962 | 0.6938        | 0.6914       |
| LPIPS    | 0.3636 | 0.3209 | 0.3144        | 0.3125 | <b>0.3124</b> | 0.3129       |
| Time (s) | 0      | 12     | 23            | 35     | 46            | 57           |

Table A. Changes in performance according to the number of iterations for adaptation in OmniBlender [7].

fastest running speed. Additionally, the PSNR values get higher than ODGS within a minute of optimization, which are denoted as OmniSplat+opt. From the figure, we maintain that OmniSplat achieves the best PSNR-runtime trade-off for novel view synthesis.

### B. Additional Gaussian Segmentation and Editing Results

To facilitate 3D editing in the result Gaussians, we first construct multiview consistent segmentation maps using the cross-attention scores. Figure B presents additional examples of multiview consistent segmentation. The selection operation allows users to choose regions by selecting Gaussians with the same label. Unlike optimization-based methods, pixel-aligned Gaussians provide cleaner boundary separa-

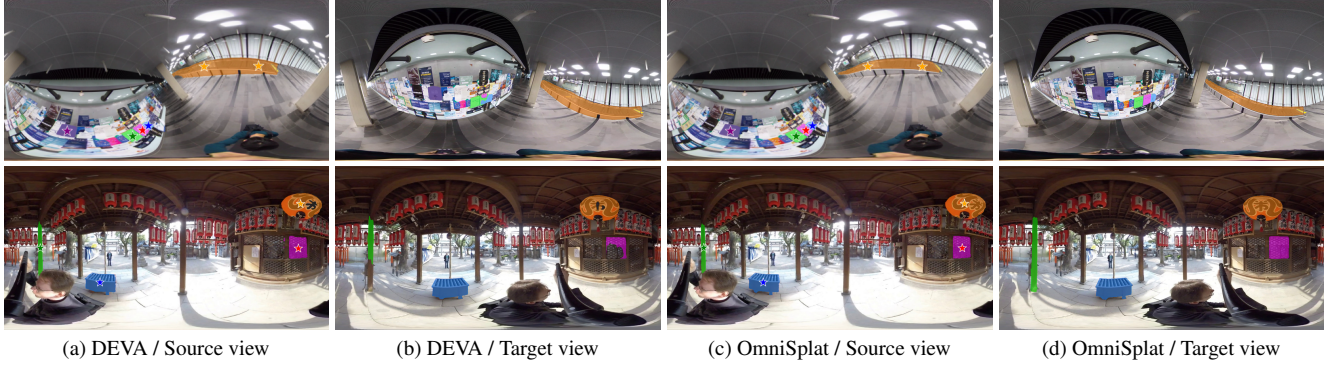

Figure B. **Visualization of segmentation matching.** We visualize the matched segments among the source and the target views. The stars in the image indicate query points for the user to segment objects containing the stars.

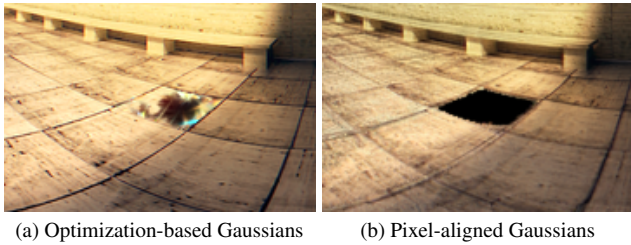

Figure C. **Example of Gaussian removal results in the object segment.** Compared to (a), where overlapping Gaussians result in incomplete removal, (b) pixel-aligned Gaussians offer clear edges that are advantageous for editing.

tion. Figure C illustrates the result of removing 3D Gaussians selected based on the multiview segmentation regions. The removal result with the Gaussians optimized as 3DGS is illustrated in Figure Ca. Since the optimized Gaussians tend to have elongated shapes [15, 33, 36], the selected regions are not cleanly removed, often resulting in needle-like artifacts. In contrast, our method with the pixel-aligned Gaussians provides clear boundaries, enabling a cleaner removal operation and establishing a solid foundation for subsequent operations such as image inpainting.

### C. Implementation Details and Additional Quantitative Results

We write the indices for reference and test views for each scene in Tables B to G along with detailed quantitative results. For three datasets with relatively small camera motions (OmniBlender, Ricoh360 [7], OmniPhotos [2]), we select the two reference views with large pose distances and set the rest as test views. For the other three datasets (360Roam [13], OmniScenes [19], 360VO [12]), the pose distance between two adjacent cameras is large, and we selected two frames with 3 to 4 timestep intervals as two reference views. Then, the test view indices are composed of frames between the reference views. For example, if the reference view indices

are 1 and 5, the test view indices are 2, 3, and 4.

Also, we write quantitative metrics for every scene in Tables B to G, respectively. The best result for each metric is written in **bold**, and the second best result is written in underlined. As shown in the tables, OmniSplat+*opt* shows the best or the second best results in almost all metrics. Although ODGS shows conspicuous results, ODGS still shows optimal quality-runtime tradeoff, considering that ODGS requires scene-wise optimization.

### D. Additional Qualitative Results

In Figures D to I, we provide additional qualitative comparison with more baselines on various datasets. Perspective feed-forward models, PixelSplat (P) [3] and MVSplat (P) [4], produce blurry images. For PixelSplat, Gaussians are generated for every pair among twelve perspective images, and since the positions of the Gaussians generated for each pair are slightly different, a blurry image is rendered in the novel viewpoints. For MVSplat, the encoded features and cross-attention values are averaged across all perspective images, which causes blur or ghost artifacts in novel view synthesized images. Omnidirectional feed-forward models, PixelSplat (O), MVSplat (O), and DepthSplat (O), produce dark images overall and striped patterns in the upper and lower areas. We attribute the phenomenon to the non-uniform sampling of the omnidirectional grid during rasterization. ODGS sometimes shows prominent image quality, but it requires over 30 minutes of optimization for each scene. Moreover, it often falls into overfitting, generating floater artifacts that severely degrade the quality of the image. Our method, OmniSplat, produces clearer and more accurate images than other feed-forward networks and ODGS. Also, the results can be further improved with a small number of optimization (OmniSplat+*opt*), which only takes 12 seconds, which is shorter than the execution time of PixelSplat (P).

We also provide a video sample that compares our models with PixelSplat (P), MVSplat (O), and ODGS. This video was rendered with a pose sequence created by interpolating

two reference views from several scenes. We can clearly see the floater artifact of ODGS, the blurriness of Pixelsplat (P), and the dark strip pattern of MVSplat (O) in this video. On the other hand, OmniSplat maintains consistently good image quality in all novel views.

| Scene                 | Ref. view | Test view     | ODGS                | PixelSplat (P)      | LatentSplat (P)     | MVSP (P)            | PixelSplat (O)      | MVSP (O)            | DepthSplat (O)      | MVSP (Y)            | OmniSplat           | OmniSplat+opt       |
|-----------------------|-----------|---------------|---------------------|---------------------|---------------------|---------------------|---------------------|---------------------|---------------------|---------------------|---------------------|---------------------|
| archviz-flat          | 14.86     | 2, 6, ..., 98 | 22.17/0.7511/0.3188 | 20.93/0.7128/0.3274 | 18.40/0.6859/0.3981 | 18.35/0.6704/0.3870 | 17.28/0.4285/0.6206 | 17.73/0.6818/0.4138 | 19.06/0.6812/0.4491 | 19.76/0.7013/0.3740 | 23.93/0.8010/0.2688 | 24.97/0.8147/0.3618 |
| barbershop            | 14.86     | 2, 6, ..., 98 | 25.01/0.7683/0.3588 | 19.83/0.6243/0.3588 | 17.96/0.5627/0.4666 | 17.98/0.5636/0.4445 | 17.70/0.4262/0.6197 | 16.60/0.5214/0.4459 | 18.13/0.5510/0.5534 | 18.32/0.5615/0.4885 | 21.76/0.7067/0.3328 | 21.75/0.7067/0.3328 |
| bistro bike           | 14.86     | 2, 6, ..., 98 | 21.05/0.6800/0.2687 | 20.20/0.5882/0.2981 | 15.43/0.4248/0.4343 | 17.29/0.4619/0.4241 | 16.50/0.3613/0.5527 | 16.40/0.5253/0.3354 | 16.97/0.4106/0.4817 | 17.54/0.4463/0.4007 | 20.20/0.6312/0.2844 | 21.75/0.6868/0.2459 |
| bistro square         | 14.86     | 2, 6, ..., 98 | 19.30/0.6397/0.3030 | 20.11/0.5989/0.2904 | 15.43/0.4290/0.4427 | 16.41/0.4348/0.4376 | 14.93/0.2878/0.5746 | 13.76/0.4338/0.4070 | 15.36/0.3853/0.5050 | 16.11/0.4381/0.4085 | 18.43/0.5535/0.3185 | 18.98/0.5845/0.2844 |
| classroom             | 14.86     | 2, 6, ..., 98 | 23.55/0.6436/0.3655 | 20.50/0.6803/0.3112 | 17.46/0.6150/0.4574 | 16.47/0.6022/0.4719 | 16.61/0.3884/0.6115 | 16.30/0.5223/0.4130 | 17.23/0.5620/0.5403 | 17.97/0.6018/0.4537 | 20.91/0.7213/0.3505 | 21.63/0.7254/0.3107 |
| fisher hut            | 14.86     | 2, 6, ..., 98 | 21.07/0.6526/0.3516 | 22.75/0.7389/0.3253 | 19.91/0.6673/0.3773 | 21.08/0.7226/0.3660 | 18.89/0.4390/0.5900 | 20.90/0.6487/0.4265 | 21.83/0.6690/0.4156 | 21.79/0.6726/0.3644 | 25.08/0.7254/0.3155 | 26.60/0.7262/0.2743 |
| lone monk             | 14.86     | 2, 6, ..., 98 | 20.21/0.6907/0.3402 | 16.89/0.5907/0.3402 | 14.12/0.4640/0.4077 | 15.23/0.3075/0.5029 | 14.93/0.3075/0.5029 | 13.09/0.5371/0.4259 | 15.69/0.4690/0.4417 | 16.51/0.5120/0.3855 | 19.04/0.6175/0.2978 | 19.28/0.6374/0.2945 |
| LOU                   | 14.86     | 2, 6, ..., 98 | 21.53/0.7332/0.2469 | 18.97/0.6801/0.3246 | 14.47/0.5251/0.4452 | 15.17/0.4348/0.4459 | 16.49/0.4040/0.5842 | 18.16/0.6678/0.3141 | 16.53/0.5327/0.4082 | 16.72/0.4991/0.3821 | 20.51/0.6438/0.3071 | 20.33/0.7420/0.2622 |
| pavilion middle chair | 14.86     | 2, 6, ..., 98 | 21.24/0.6541/0.3516 | 21.28/0.7035/0.3198 | 18.29/0.6050/0.4178 | 18.06/0.6347/0.3868 | 17.06/0.4832/0.5765 | 17.86/0.6136/0.4251 | 17.86/0.6136/0.4251 | 18.06/0.6856/0.3216 | 21.02/0.7026/0.3561 | 22.09/0.7026/0.3561 |
| pavilion middle pond  | 14.86     | 2, 6, ..., 98 | 19.21/0.4918/0.4229 | 19.70/0.6058/0.3553 | 15.31/0.4486/0.5241 | 14.24/0.4348/0.6142 | 15.40/0.3021/0.6316 | 15.63/0.4752/0.4120 | 16.46/0.4528/0.4074 | 16.24/0.4902/0.4407 | 18.34/0.5609/0.3776 | 19.18/0.5749/0.3328 |
| restroom              | 14.86     | 2, 6, ..., 98 | 30.21/0.8030/0.2220 | 24.95/0.6947/0.3132 | 23.33/0.6481/0.4063 | 21.71/0.6551/0.4263 | 21.54/0.4381/0.5999 | 21.43/0.6229/0.3305 | 21.67/0.5730/0.5103 | 23.16/0.6379/0.4304 | 23.02/0.7266/0.3792 | 28.17/0.7720/0.2845 |
| average               | -         | -             | 22.23/0.6807/0.3124 | 20.56/0.6562/0.3222 | 17.28/0.5523/0.4361 | 17.48/0.5565/0.4385 | 16.97/0.3837/0.5967 | 16.97/0.5635/0.3949 | 17.89/0.5364/0.4753 | 18.43/0.5627/0.4107 | 21.02/0.6601/0.3231 | 22.33/0.6994/0.2879 |

Table B. Scene-wise quantitative results of 3D reconstruction on **OmniBlender** dataset.

| Scene          | Ref. view | Test view     | ODGS                | PixelSplat (P)      | LatentSplat (P)     | MVSP (P)            | PixelSplat (O)      | MVSP (O)            | DepthSplat (O)      | MVSP (Y)            | OmniSplat           | OmniSplat+opt       |
|----------------|-----------|---------------|---------------------|---------------------|---------------------|---------------------|---------------------|---------------------|---------------------|---------------------|---------------------|---------------------|
| bricks         | 35.69     | 1, 3, ..., 99 | 16.41/0.5116/0.3738 | 16.28/0.5161/0.4249 | 13.38/0.4586/0.4781 | 17.86/0.5834/0.3820 | 15.89/0.4091/0.5296 | 15.01/0.5017/0.4070 | 13.34/0.3861/0.5950 | 16.76/0.5072/0.4053 | 19.25/0.5980/0.3374 | 19.91/0.6388/0.3052 |
| bridge         | 33.57     | 1, 3, ..., 99 | 15.84/0.4353/0.4546 | 16.45/0.5264/0.3999 | 15.71/0.4367/0.5402 | 18.88/0.6020/0.2446 | 16.62/0.3937/0.5269 | 13.83/0.4450/0.4677 | 13.41/0.4371/0.5585 | 16.80/0.5111/0.3976 | 19.13/0.5947/0.3436 | 19.53/0.6198/0.3183 |
| bridge under   | 23.77     | 1, 3, ..., 99 | 18.57/0.4841/0.3916 | 15.78/0.4519/0.4572 | 14.67/0.4772/0.4473 | 14.24/0.4492/0.4896 | 15.51/0.3123/0.5839 | 16.08/0.4179/0.4140 | 16.72/0.4394/0.4879 | 17.57/0.4607/0.4183 | 19.59/0.5598/0.3572 | 19.52/0.5794/0.3292 |
| cat tower      | 3.83      | 1, 3, ..., 99 | 15.09/0.4641/0.4210 | 20.19/0.7243/0.3186 | 17.14/0.4167/0.6799 | 17.14/0.4167/0.6799 | 16.68/0.3654/0.5489 | 16.53/0.4640/0.4855 | 14.83/0.4511/0.5021 | 16.05/0.4910/0.4359 | 18.65/0.5348/0.4005 | 19.42/0.5507/0.3579 |
| center         | 25.49     | 1, 3, ..., 99 | 19.56/0.6045/0.3659 | 21.61/0.6936/0.2948 | 17.28/0.3716/0.5863 | 21.32/0.7594/0.3107 | 17.97/0.4407/0.5556 | 17.01/0.6090/0.3886 | 16.38/0.5985/0.4985 | 19.15/0.6708/0.3459 | 20.66/0.7094/0.3210 | 21.57/0.7320/0.2887 |
| farm           | 83.99     | 1, 3, ..., 99 | 18.05/0.5087/0.3431 | 18.31/0.5168/0.3605 | 16.31/0.4110/0.4937 | 19.73/0.6789/0.3447 | 16.49/0.3470/0.5068 | 12.93/0.3631/0.4969 | 17.22/0.4613/0.4171 | 17.76/0.4940/0.3723 | 18.29/0.5133/0.3646 | 18.56/0.5222/0.3409 |
| flower         | 29.55     | 1, 3, ..., 99 | 15.37/0.4163/0.4084 | 17.02/0.5129/0.4260 | 16.46/0.4410/0.4992 | 16.03/0.5468/0.4202 | 15.65/0.3063/0.5376 | 14.57/0.3507/0.4954 | 15.21/0.3630/0.5423 | 14.83/0.3561/0.4838 | 16.90/0.4306/0.4350 | 17.46/0.4436/0.4120 |
| gallery chair  | 5.23      | 1, 3, ..., 99 | 19.78/0.6557/0.3387 | 25.12/0.8192/0.2625 | 18.96/0.3871/0.7146 | 22.86/0.7280/0.3349 | 19.19/0.4497/0.5694 | 17.62/0.5742/0.4504 | 19.57/0.6800/0.4585 | 20.26/0.7888/0.4039 | 22.30/0.7374/0.3264 | 22.89/0.7427/0.3060 |
| gallery park   | 33.99     | 1, 3, ..., 99 | 16.29/0.5766/0.3848 | 19.19/0.6971/0.3601 | 18.77/0.3470/0.7216 | 19.67/0.7169/0.3522 | 18.65/0.4561/0.5442 | 17.54/0.5931/0.4490 | 14.04/0.5440/0.5199 | 17.99/0.6154/0.4014 | 19.64/0.6568/0.3670 | 20.13/0.6653/0.3040 |
| gallery pillar | 21.39     | 1, 3, ..., 99 | 19.67/0.6461/0.3664 | 21.80/0.7497/0.3213 | 20.00/0.3621/0.7285 | 19.03/0.6873/0.3694 | 17.23/0.3913/0.5875 | 17.16/0.5931/0.4376 | 19.70/0.6556/0.4402 | 20.33/0.6451/0.3821 | 21.45/0.7052/0.3477 | 22.51/0.7282/0.3048 |
| garden         | 31.59     | 1, 3, ..., 99 | 16.97/0.5338/0.4027 | 20.38/0.6525/0.3989 | 19.22/0.3886/0.6406 | 23.02/0.7193/0.3373 | 18.84/0.3943/0.5652 | 15.53/0.4060/0.4790 | 16.13/0.5098/0.5158 | 20.73/0.5723/0.4244 | 22.43/0.6335/0.3406 | 23.45/0.6544/0.3052 |
| poster         | 51.85     | 1, 3, ..., 99 | 18.46/0.5342/0.4219 | 20.15/0.6964/0.3263 | 15.72/0.4675/0.5827 | 17.99/0.6179/0.4047 | 16.01/0.3879/0.5911 | 14.36/0.4897/0.4582 | 13.61/0.4881/0.5847 | 17.22/0.5780/0.4435 | 18.71/0.6517/0.3761 | 19.36/0.6674/0.3551 |
| average        | -         | -             | 17.51/0.5309/0.3911 | 19.94/0.6486/0.3119 | 16.30/0.5389/0.4386 | 18.12/0.5947/0.3804 | 17.66/0.4356/0.5810 | 15.89/0.5478/0.4049 | 17.43/0.5470/0.4482 | 17.88/0.5482/0.4123 | 19.70/0.6104/0.3598 | 20.36/0.6288/0.3303 |

Table C. Scene-wise quantitative results of 3D reconstruction on **Ricoh360** dataset.

| Scene         | Ref. view | Test view     | ODGS                | PixelSplat (P)      | LatentSplat (P)     | MVSP (P)            | PixelSplat (O)      | MVSP (O)            | DepthSplat (O)      | MVSP (Y)            | OmniSplat           | OmniSplat+opt       |
|---------------|-----------|---------------|---------------------|---------------------|---------------------|---------------------|---------------------|---------------------|---------------------|---------------------|---------------------|---------------------|
| Ballinloy     | 0.35      | 0, 5, ..., 90 | 19.89/0.5674/0.2157 | 21.78/0.7294/0.2729 | 17.89/0.6572/0.3928 | 20.46/0.7433/0.2816 | 18.49/0.4102/0.5756 | 18.45/0.7034/0.3039 | 20.34/0.7056/0.3548 | 20.12/0.7628/0.3308 | 19.07/0.7751/0.3469 | 21.46/0.8076/0.4315 |
| BeihaiPark    | 0.55      | 0, 5, ..., 80 | 21.38/0.6417/0.2835 | 20.37/0.6286/0.3051 | 17.64/0.5379/0.4567 | 16.86/0.4977/0.4817 | 16.89/0.4015/0.5363 | 14.06/0.4564/0.4584 | 16.32/0.4822/0.4371 | 16.52/0.4948/0.4202 | 17.52/0.5324/0.3989 | 17.62/0.5432/0.3733 |
| Cathedral     | 0.50      | 0, 5, ..., 80 | 19.54/0.5006/0.3809 | 17.08/0.5528/0.3270 | 13.50/0.3863/0.4850 | 15.29/0.4623/0.4196 | 13.22/0.2504/0.6097 | 13.79/0.4555/0.4124 | 14.64/0.4180/0.4833 | 15.12/0.4402/0.4537 | 15.71/0.5288/0.4045 | 16.24/0.5658/0.3672 |
| Coast         | 0.45      | 0, 5, ..., 80 | 21.03/0.4943/0.4314 | 22.53/0.7179/0.2839 | 17.95/0.5629/0.4724 | 21.74/0.7544/0.2828 | 17.78/0.3252/0.5968 | 18.02/0.6409/0.3138 | 19.54/0.5807/0.4244 | 19.43/0.6072/0.3382 | 19.89/0.6807/0.3580 | 21.64/0.7268/0.2645 |
| Field         | 0.45      | 0, 5, ..., 75 | 21.10/0.5530/0.4285 | 25.70/0.7509/0.2636 | 19.96/0.6498/0.4201 | 25.54/0.7584/0.2970 | 19.19/0.4497/0.5694 | 20.04/0.6931/0.3745 | 21.40/0.6279/0.4337 | 23.14/0.6644/0.3847 | 22.20/0.6903/0.4038 | 25.15/0.7116/0.2986 |
| Numokiki2     | 0.50      | 0, 5, ..., 80 | 19.62/0.5883/0.3876 | 20.03/0.6641/0.3096 | 16.47/0.5805/0.4115 | 18.15/0.6152/0.3897 | 16.03/0.4017/0.5563 | 16.67/0.5549/0.4363 | 19.15/0.5970/0.4193 | 18.91/0.5965/0.3930 | 19.89/0.6267/0.3906 | 19.68/0.6519/0.3215 |
| SecretGarden1 | 0.40      | 0, 5, ..., 75 | 20.91/0.6096/0.3430 | 19.57/0.6675/0.3021 | 17.00/0.5812/0.4043 | 17.85/0.6073/0.3741 | 18.50/0.4073/0.5424 | 15.13/0.5545/0.4298 | 17.44/0.5730/0.4345 | 17.85/0.6203/0.3968 | 17.71/0.6814/0.3370 | 20.71/0.7059/0.2946 |
| Shrines1      | 0.45      | 0, 5, ..., 90 | 18.34/0.4264/0.3979 | 16.88/0.4936/0.4174 | 13.35/0.3260/0.5337 | 15.71/0.4179/0.5271 | 15.56/0.2643/0.5913 | 14.35/0.3434/0.4814 | 14.67/0.3491/0.5763 | 19.39/0.3655/0.5163 | 16.75/0.4375/0.4634 | 17.37/0.4712/0.4282 |
| Temple3       | 0.25      | 0, 5, ..., 70 | 20.83/0.6062/0.3167 | 17.17/0.5869/0.3441 | 14.21/0.4620/0.4762 | 13.63/0.4758/0.4555 | 13.02/0.3183/0.6215 | 12.30/0.4879/0.4152 | 13.02/0.4896/0.5080 | 14.51/0.5221/0.4395 | 16.24/0.6164/0.3657 | 16.67/0.6164/0.3657 |
| Wukongting    | 0.50      | 0, 5, ..., 95 | 19.88/0.6722/0.3403 | 18.31/0.6938/0.2926 | 15.01/0.6450/0.4135 | 16.04/0.6192/0.3652 | 15.56/0.3827/0.5816 | 16.10/0.6424/0.4236 | 16.79/0.6466/0.4108 | 16.59/0.6461/0.3760 | 19.13/0.7412/0.3253 | 19.76/0.7633/0.2773 |
| average       | -         | -             | 20.25/0.5660/0.3730 | 19.94/0.6486/0.3119 | 16.30/0.5389/0.4386 | 18.12/0.5947/0.3804 | 17.66/0.4356/0.5810 | 15.89/0.5478/0.4049 | 17.43/0.5470/0.4482 | 17.76/0.5768/0.4051 | 18.50/0.6311/0.3794 | 19.63/0.6608/0.3273 |

Table D. Scene-wise quantitative results of 3D reconstruction on **OmniPhotos** dataset.

| Scene    | Ref. view | Test view  | ODGS                | PixelSplat (P)      | LatentSplat (P)     | MVSP (P)            | PixelSplat (O)      | MVSP (O)            | DepthSplat (O)      | MVSP (Y)            | OmniSplat           | OmniSplat+opt       |
|----------|-----------|------------|---------------------|---------------------|---------------------|---------------------|---------------------|---------------------|---------------------|---------------------|---------------------|---------------------|
| bar      | 6.10      | 7, 8, 9    | 17.59/0.5680/0.3151 | 14.25/0.5383/0.4582 | 13.76/0.3802/0.5071 | 13.42/0.3278/0.5498 | 13.16/0.2092/0.6602 | 11.90/0.2472/0.5911 | 12.49/0.2652/0.6354 | 13.48/0.3211/0.5363 | 13.28/0.2862/0.5827 | 16.90/0.4730/0.4315 |
| base     | 21.25     | 22, 23, 24 | 19.37/0.5900/0.3069 | 20.37/0.6286/0.3051 | 14.03/0.4357/0.4664 | 15.79/0.4301/0.4723 | 13.48/0.3134/0.6492 | 12.42/0.3149/0.4942 | 14.62/0.3606/0.5305 | 14.69/0.3652/0.5062 | 15.41/0.4231/0.4593 | 15.27/0.3996/0.4303 |
| cafe     | 41.45     | 42, 43, 44 | 18.41/0.5789/0.3565 | 19.05/0.4919/0.4498 | 15.52/0.4934/0.4787 | 17.17/0.4946/0.4764 | 15.08/0.2912/0.6352 | 13.28/0.3129/0.4828 | 16.64/0.4424/0.5380 | 16.77/0.4486/0.5003 | 18.23/0.5444/0.4240 | 19.05/0.5758/0.3976 |
| cantenna | 74.78     | 75, 76, 77 | 16.42/0.4282/0.4944 | 13.37/0.4187/0.5467 | 12.94/0.4511/0.5565 | 13.39/0.4411/0.5745 | 13.44/0.2678/0.6525 | 10.99/0.2637/0.6211 | 13.55/0.4009/0.6010 | 14.38/0.4320/0.5675 | 15.39/0.4578/0.5203 | 15.16/0.4031/0.5318 |
| center   | 52.56     | 53, 54, 55 | 21.07/0.6161/0.3905 | 17.17/0.5947/0.4146 | 16.70/0.6133/0.4874 | 16.91/0.5933/0.4656 | 17.05/0.4015/0.5175 | 17.15/0.5602/0.5346 | 18.11/0.6064/0.4883 | 20.48/0.6726/0.4130 | 20.88/0.6652/0.3642 | 21.05/0.6559/0.3215 |
| center1  | 36.40     | 37, 38, 39 | 19.37/0.6232/0.4377 | 16.33/0.6594/0.4464 | 16.12/0.6832/0.4784 | 16.35/0.6534/0.4868 | 15.31/0.2966/0.6798 | 12.10/0.3938/0.5798 | 18.03/0.6464/0.5146 | 17.39/0.6279/0.5318 | 20.59/0.7127/0.4459 | 20.69/0.            |



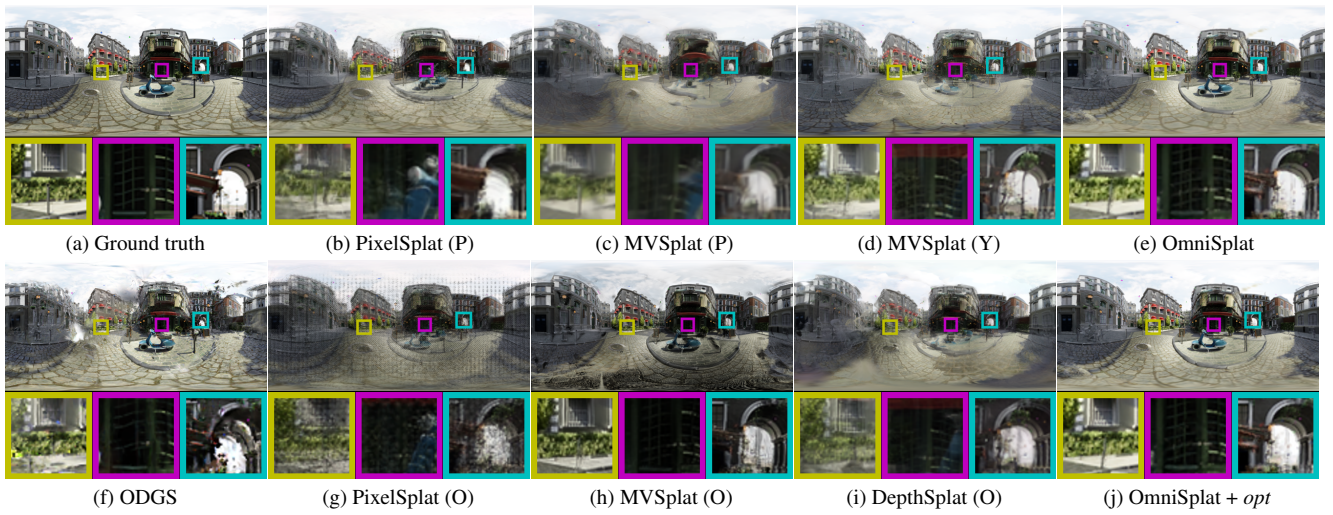

Figure D. Qualitative comparison on OmniBlender dataset.

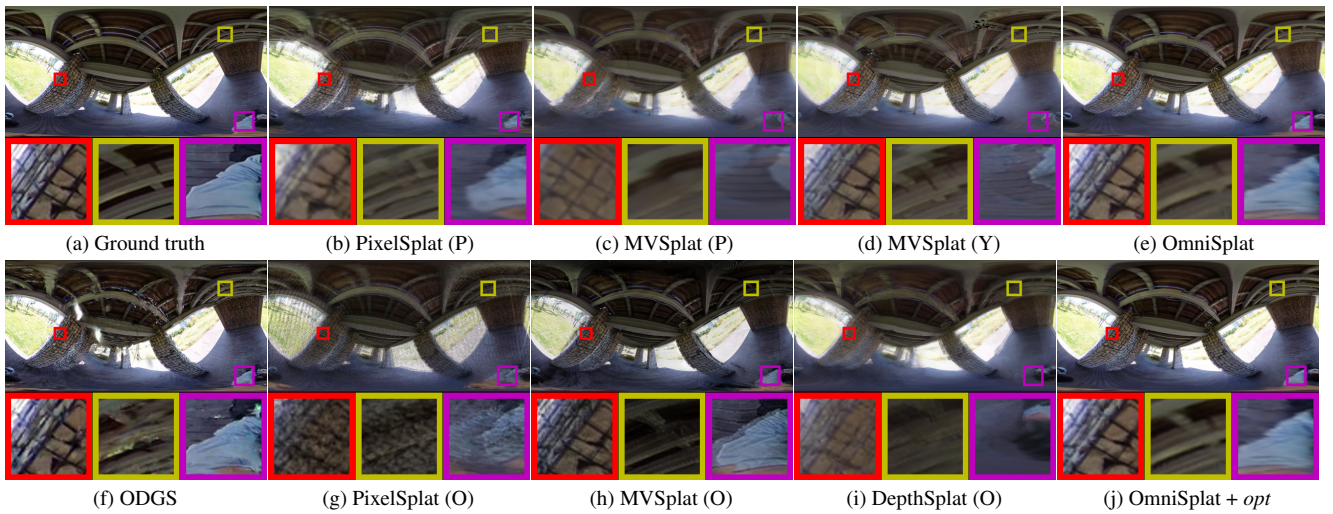

Figure E. Qualitative comparison on Ricoh dataset.

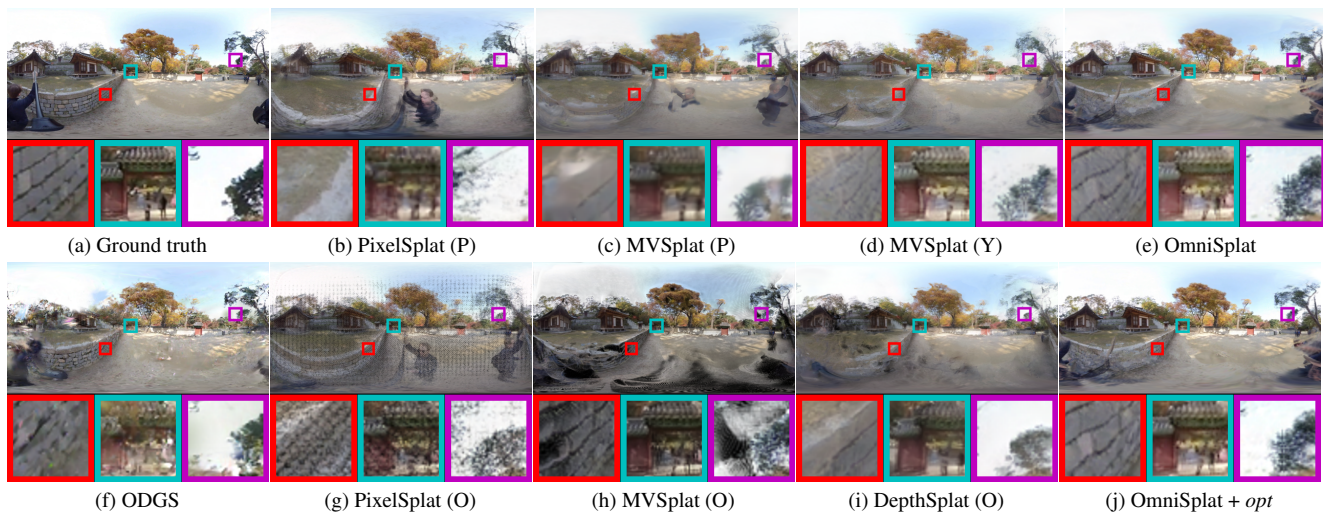

Figure F. Qualitative comparison on OmniPhotos dataset.

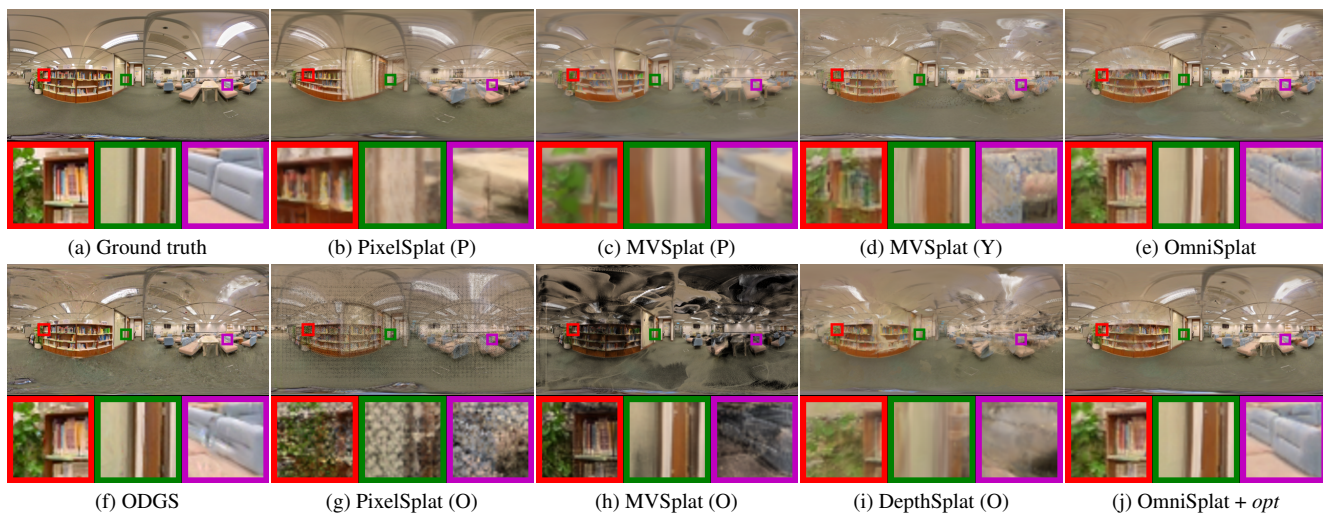

Figure G. Qualitative comparison on 360Roam dataset.



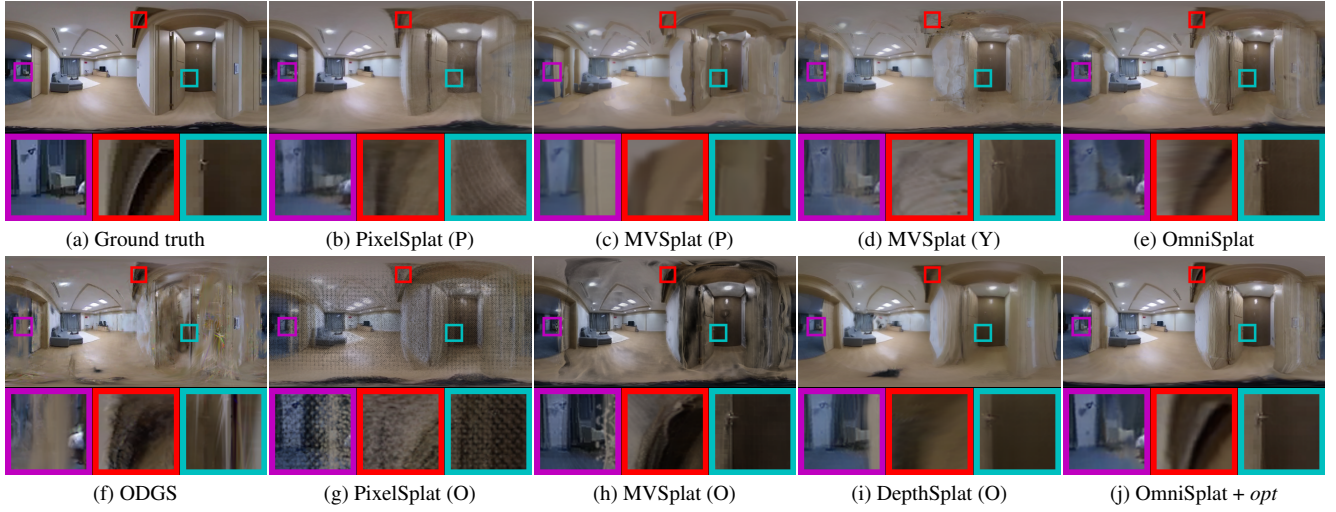

Figure H. Qualitative comparison on OmniScenes dataset.

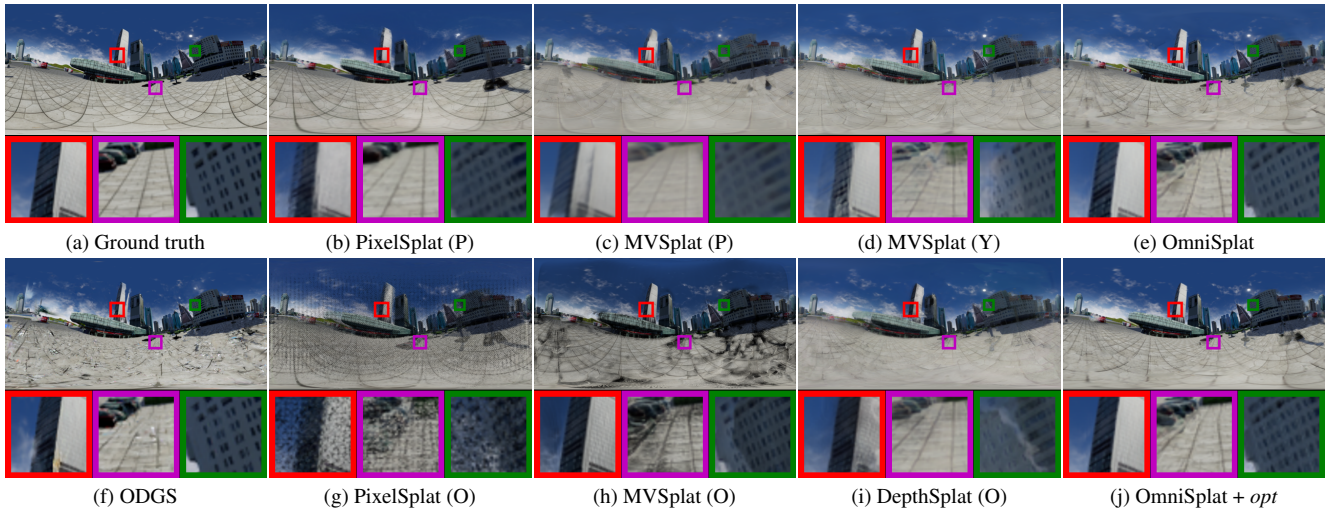

Figure I. Qualitative comparison on 360VO dataset.
